# Supplementary material for: BOFdat: Generating biomass objective functions for genome-scale metabolic models from experimental data
Source: PLoS Comput Biol. 2019 Apr 22;15(4):e1006971. doi: 10.1371/journal.pcbi.1006971 (PMC6497307; doi:10.1371/journal.pcbi.1006971)
Supplement: S1 File — (CSV) [file pcbi.1006971.s010.csv]

	Name	SEED_ID	BiGG_ID	BiGG_ID_iML1515	Coefficients
0	CTP_c0	cpd00052_c0	ctp	ctp_c	-0.0841036157
1	Isoheptadecanoylcardiolipin_B_subtilis_c0	cpd15794_c0	cdlp_BS	clpn180_p	-0.0106480421
2	S_Adenosyl_L_methionine_c0	cpd00017_c0	amet	amet_c	-0.0030964669
3	Cu2_plus__c0	cpd00058_c0	cu2	cu2_c	-0.0030964669
4	Siroheme_c0	cpd00557_c0	sheme	sheme_c	-0.0030964669
5	L_Glutamate_c0	cpd00023_c0	glu__L	glu__L_c	-0.219088153
6	fe3_c0	cpd10516_c0	fe3	fe3_c	-0.0030964669
7	L_Histidine_c0	cpd00119_c0	his__L	his__L_c	-0.0792636001
8	10_Formyltetrahydrofolate_c0	cpd00201_c0	10fthf	10fthf_c	-0.0030964669
9	Spermidine_c0	cpd00264_c0	spmd	spmd_c	-0.0030964669
10	TTP_c0	cpd00357_c0	ttp	dttp_c	-0.0160206718
11	L_Asparagine_c0	cpd00132_c0	asp__L	asp__L_c	-0.2008308069
12	L_Lysine_c0	cpd00039_c0	lys__L	lys__L_c	-0.2854380205
14	Fe2_plus__c0	cpd10515_c0	fe2	fe2_c	-0.0030964669
15	L_Cysteine_c0	cpd00084_c0	cys__L	cys__L_c	-0.0761464922
16	L_Tyrosine_c0	cpd00069_c0	tyr__L	tyr__L_c	-0.1206766046
17	Mg_c0	cpd00254_c0	mg2	mg2_c	-0.0030964669
18	L_Proline_c0	cpd00129_c0	pro__L	pro__L_c	-0.1843546653
19	Co2_plus__c0	cpd00149_c0	co2	co2_c	-0.0030964669
20	FAD_c0	cpd00015_c0	fad	fad_c	-0.0030964669
21	L_Leucine_c0	cpd00107_c0	leu__L	leu__L_c	-0.3753888475
22	phosphatidylethanolamine_dioctadecanoyl_c0	cpd15533_c0	pe180	pe180_c	-0.0106480421
23	core_oligosaccharide_lipid_A_c0	cpd15432_c0	colipa	colipa_c	-0.0250105977
24	Diisoheptadecanoylphosphatidylglycerol_c0	cpd15722_c0	pg180	pg180_c	-0.0106480421
25	Mn2_plus__c0	cpd00030_c0	mn2	mn2_c	-0.0030964669
27	Ca2_plus__c0	cpd00063_c0	ca2	ca2_c	-0.0030964669
28	dATP_c0	cpd00115_c0	datp	datp_c	-0.0160206718
29	Zn2_plus__c0	cpd00034_c0	zn2	zn2_c	-0.0030964669
30	GTP_c0	cpd00038_c0	gtp	gtp_c	-0.1354068212
32	Putrescine_c0	cpd00118_c0	ptrc	ptrc_c	-0.0030964669
33	Glycine_c0	cpd00033_c0	gly	gly_c	-0.509869787
34	Bactoprenyl_diphosphate_c0	cpd02229_c0	udcpdp	udcpdp_c	-0.0250105977
35	dCTP_c0	cpd00356_c0	dctp	dctp_c	-0.0160206718
36	Menaquinone_8_c0	cpd15500_c0	mqn8	mqn8_c	-0.0030964669
38	Sulfate_c0	cpd00048_c0	so4	so4_c	-0.0030964669
39	2_Demethylmenaquinone_8_c0	cpd15352_c0	2dmmq8	2dmmq8_c	-0.0030964669
40	K_plus__c0	cpd00205_c0	k	k_c	-0.0030964669
41	Ubiquinone_8_c0	cpd15560_c0	q8	q8_c	-0.0030964669
42	L_Valine_c0	cpd00156_c0	val__L	val__L_c	-0.3522331891
43	L_Aspartate_c0	cpd00041_c0	asp__L	asp__L_c	-0.2008308069
44	L_Serine_c0	cpd00054_c0	ser__L	ser__L_c	-0.179456353
45	CoA_c0	cpd00010_c0	coa	coa_c	-0.0030964669
46	Cl__c0	cpd00099_c0	cl	cl_c	-0.0030964669
47	5_Methyltetrahydrofolate_c0	cpd00345_c0	5mthf	5mthf_c	-0.0030964669
48	dGTP_c0	cpd00241_c0	dgtp	dgtp_c	-0.0160206718
49	TPP_c0	cpd00056_c0	thmpp	thmpp_c	-0.0030964669
51	ATP_c0	cpd00002_c0	atp	atp_c	-40.1101757365
52	L_Alanine_c0	cpd00035_c0	ala__L	ala__L_c	-0.4279343802
53	Tetrahydrofolate_c0	cpd00087_c0	thf	thf_c	-0.0030964669
54	NADP_c0	cpd00006_c0	nadp	nadp_c	-0.0030964669
55	NAD_c0	cpd00003_c0	nad	nad_c	-0.0030964669
56	UTP_c0	cpd00062_c0	utp	utp_c	-0.0908319049
57	Dianteisoheptadecanoylphosphatidylglycerol_c0	cpd15723_c0	pg160	pg160_c	-0.0106480421
59	H2O_c0	cpd00001_c0	h2o	h2o_c	-35.540309243
60	L_Phenylalanine_c0	cpd00066_c0	phe__L	phe__L_c	-0.15451949
61	Dianteisoheptadecanoylphosphatidylethanolamine_c0	cpd15696_c0	pe181	pe181_c	-0.0106480421
62	L_Isoleucine_c0	cpd00322_c0	ile__L	ile__L_c	-0.2417985103
63	L_Glutamine_c0	cpd00053_c0	gln__L	gln__L_c	-0.219088153
64	Diisoheptadecanoylphosphatidylethanolamine_c0	cpd15695_c0	pe160	pe160_c	-0.0106480421
66	L_Methionine_c0	cpd00060_c0	met__L	met__L_c	-0.1278014226
67	L_Threonine_c0	cpd00161_c0	thr__L	thr__L_c	-0.2110727328
68	Phosphatidylglycerol_dioctadecanoyl_c0	cpd15540_c0	pg180	pg180_c	-0.0106480421
70	L_Tryptophan_c0	cpd00065_c0	trp__L	trp__L_c	-0.0472019191
71	L_Arginine_c0	cpd00051_c0	arg__L	arg__L_c	-0.2466968227
72	Heme_c0	cpd00028_c0	hemeO	hemeO_c	-0.0030964669
73	Riboflavin_c0	cpd00220_c0	ribflv	ribflv_c	-0.0030964669
74	GSH_c0	cpd00042_c0	gthrd	gthrd_c	-0.0030964669
75	Pyridoxal_phosphate_c0	cpd00016_c0	pydx5p	pydx5p_c	-0.0030964669
